# Supplementary material
Source: publisher figshare collection journal article supplement (https://rs.figshare.com/ndownloader/files/27856374)
Supplement: Supplementary file 1 [file 27856374]

**Fig. S1.** Comparison of the substitution rates estimated for the different mitogenome partitions using BEAST from both the original and 20 date-randomized datasets from the date- randomization test (DRT).

**Fig. S2.** Deamination patterns obtained using mapDamage at the ends of the sequencing read. Shown on the left is the C to T deamination rate at the 5’ end, and on the right the G to A rate at the 3’ end. From top to bottom: (a) USER treated libraries, (b) non-USER treated libraries, and (c) sequencing libraries from the same extract that were USER and non-USER treated.

**Fig. S3.** MrBayes phylogeny of the 37 giant deer mitogenomes analysed in this study. Label colours represent clade affiliation. Only posterior probabilities > 0.5 are shown. Dates indicate age of the specimens.

**ESM submitted as Excel file:**

**Table S1.** Sequencing and mapping statistic on the 90 shotgun sequenced Megaloceros giganteus

**Table S2**. Information on the Megaloceros giganteus samples that were used in the capture experiments and/or included in the phylogenetic analyses.

**Table S3.** Baits used in this study for the mitochondrial DNA capture experiment. Baits were designed by MYBaits based on the consensus sequences from Immel et al. 2015. The array contains 733 baits, with a length of 80mer probes with either and 4x (mito) flexible tiling density.
